# Supplementary material
Source: PubMed Central journal article supplement (PMC6283413)
Supplement: en.2017-00582_supplemental_tables_figures.pdf [file en.2017-00582_supplemental_tables_figures.pdf]

## Table S1.

### Taqman probes used for real-time PCR

| <b>Gene</b> | <b>Name</b>                              | <b>Accession Nr.</b> |
|-------------|------------------------------------------|----------------------|
| Luciferase  | Firefly luciferase enzyme                | AIY9ZTZ              |
| dio2        | Type 2 deiodinase                        | Mm00515664_m1        |
| GAPDH       | glyceraldehyde-3-phosphate dehydrogenase | Mm99999915_g1        |

**Table S2.****Serum free thyroid hormone levels and body weight of THAI mice**

|                 | <b>WT</b>    | <b>THAI #4</b> | P value | <b>THAI #23</b> | P value | <b>THAI #18</b> | P value |
|-----------------|--------------|----------------|---------|-----------------|---------|-----------------|---------|
| fT4 (pmol/L)    | 13.44 ± 1.81 | 10.57 ± 1.96   | 0.325   | 12.86±1.44      | 0.811   | 12.89±2.03      | 0.846   |
| fT3 (pmol/L)    | 5.33 ± 0.74  | 4.26 ± 0.41    | 0.249   | 4.27±0.36       | 0.247   | 4.40±0.39       | 0.309   |
| body weight (g) | 29.83 ± 1.27 | 32.93 ± 1.31   | 0.14    | 28.33±0.42      | 0.223   | 27.5±1.51       | 0.344   |

Results are expressed as means ± SEM (n=4). No significant difference was found (wt vs. THAI) by Student's t-test.

## Table S3.

### Metabolic phenotyping and body composition of THAI mice

|                                                     | WT            | THAI #4       | P value |
|-----------------------------------------------------|---------------|---------------|---------|
| lean body mass %                                    | 80.51 ± 2.03  | 81.92 ± 1.53  | 0.6     |
| fat mass %                                          | 13.07 ± 2.27  | 12.79 ± 1.77  | 0.92    |
| daily average RER VCO <sub>2</sub> /VO <sub>2</sub> | 0.86 ± 0.03   | 0.86 ± 0.01   | 0.91    |
| daily average VO <sub>2</sub> (ml/kg lean body/h)   | 3746.49 ± 328 | 4072.59 ± 184 | 0.42    |

Results are expressed as means ± SEM (n=4). No significant difference was found (wt vs. THAI) by Student's t-test.

**Fig. S1.**

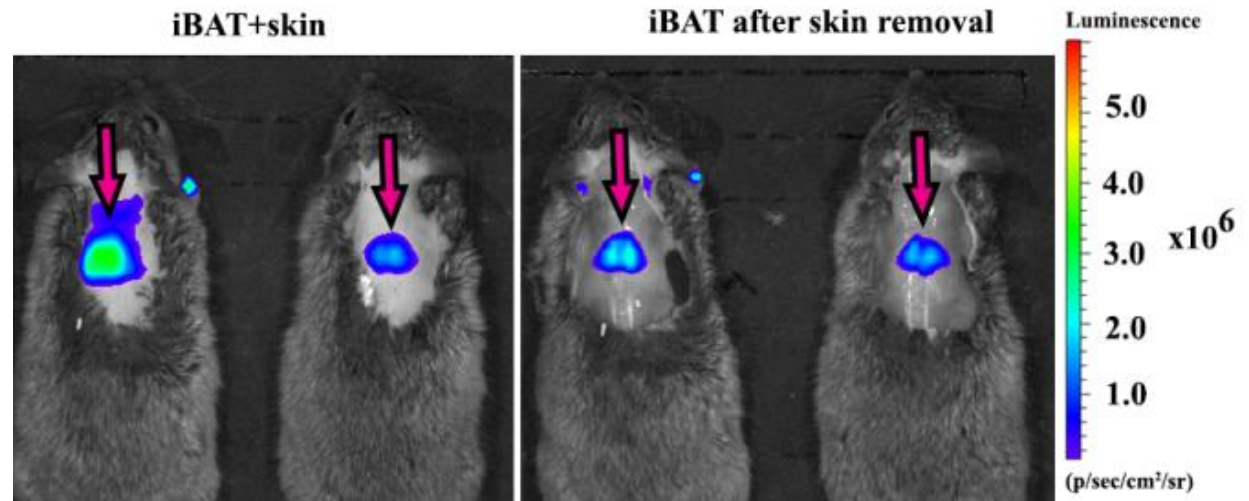

Bioluminescence in #4 THAI mice. Bioluminescence of the interscapular region of live THAI #4 mice originates from the iBAT. Animals were injected with L-T3 (1  $\mu\text{g/g}$  bw *i.p.* 24h before imaging). The animals were anesthetised before imaging. Intact animal (left) and direct imaging of iBAT after removal of skin of the interscapular region (right).

**Fig. S2.**

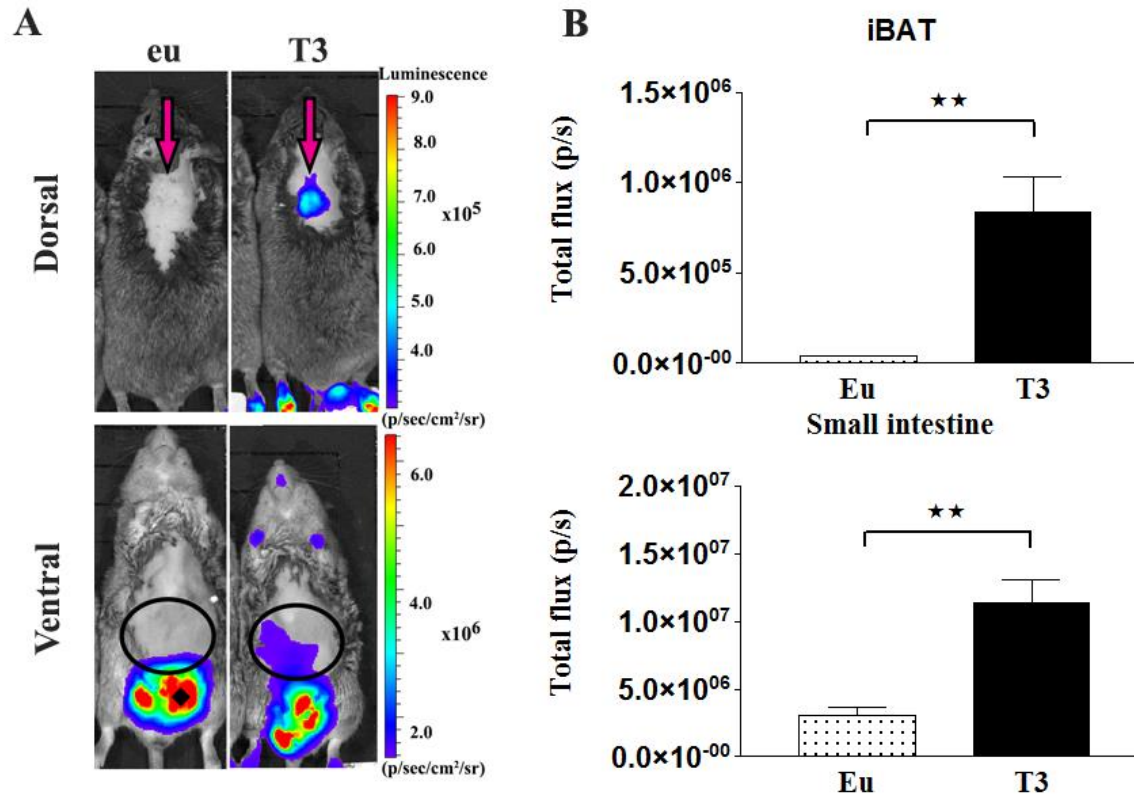

Detection of TH action in live #23 animals. (a) In vivo bioluminescence imaging on euthyroid and L-T3-treated (1  $\mu\text{g/g}$  bw injected i.p. 24h before imaging) THAI #23 mice followed by i.p. luciferin administration. Representative images of euthyroid (eu) and L-T3 treated (T3) mice and light intensity diagram of iBAT and small intestine. L-T3 injection increased light intensity in iBAT and small intestine. Dorsal image arrow: iBAT; Ventral image circle: intestine;  $\blacklozenge$ : testicles (b) Light intensity diagram (photon/sec) of luciferase activity in iBAT and small intestine of euthyroid and L-T3-treated THAI #23 mice. Mean of photon/sec  $\pm$  SEM (n=5) \*\* P<0.01 by Student's t-test.
